# Supplementary material for: Heterogeneous CeO2 catalyst for the one-pot synthesis of organic carbamates from amines, CO2 and alcohols
Source: Royal Society of Chemistry journal article supplement (doi:10.1039/c1gc15646b), 2011-01-01
Supplement: c1gc15646b.pdf [file c1gc15646b.pdf]

Supporting Information for  
Heterogeneous CeO<sub>2</sub> catalyst for one-pot synthesis of organic carbamates  
from amines, CO<sub>2</sub> and alcohols

Masayoshi Honda, Satoru Sonehara, Hiroshi Yasuda, Yoshinao Nakagawa, and Keiichi Tomishige

#### The detail procedure of dibenzylurea synthesis

Benzylamine solution (Benzylamine 4.82 g (45 mmol) + toluene 20 ml) was dropped into the solution of *N, N'*-carbonyldiimidazole (*N, N'*-carbonyldiimidazole 3.23 g (20 mmol) + toluene 20 ml), and the mixture was stirred for 3 h under air atmosphere.

After the reaction, 30 ml of 10% HCl<sub>aq</sub> was added and the reaction mixture was separated. Then the reaction mixture was washed and dried by Na<sub>2</sub>SO<sub>4</sub> all night long. Dibenzylurea, the white crystal, was filtrated and obtained with 39% yield.

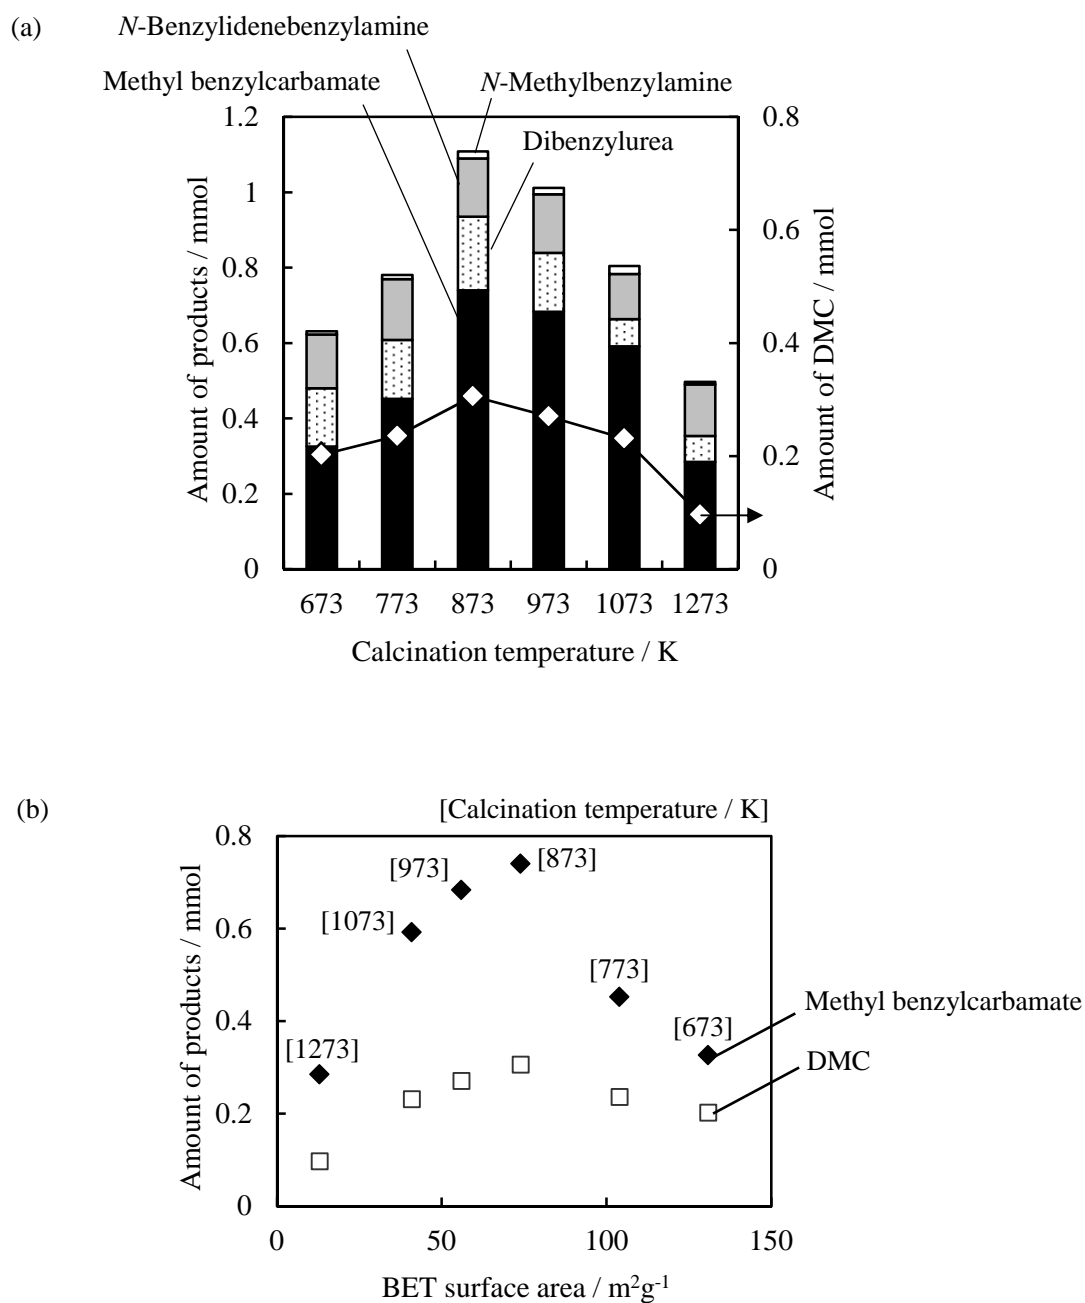

Figure S1. Results of the reaction of  $C_6H_5CH_2NH_2 + CO_2 + CH_3OH$  over  $CeO_2$  calcined at various temperatures (a) Relation between the amount of products and the calcination temperature, (b) Relation between the amount of products and BET surface area of  $CeO_2$ .

Reaction conditions:  $CeO_2$  0.03 g,  $C_6H_5CH_2NH_2 : CH_3OH = 5 \text{ mmol} : 500 \text{ mmol}$ ,  $CO_2$  5 MPa, 423 K, 2 h.

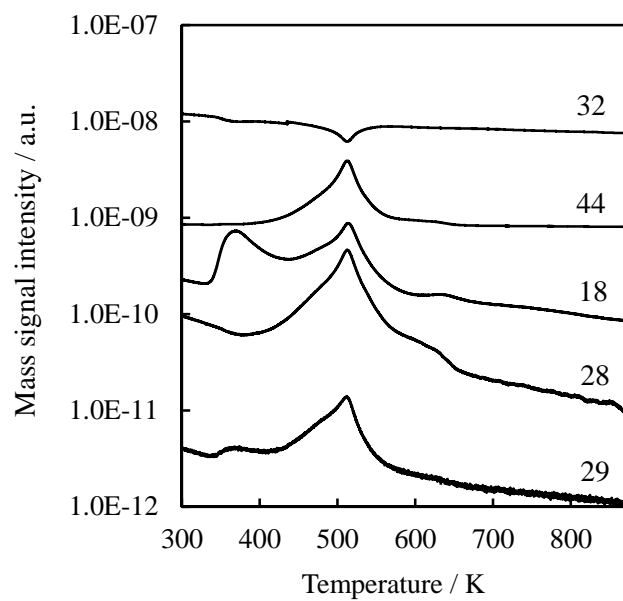

Figure S2. TPO profile of the CeO<sub>2</sub> after the reaction of C<sub>6</sub>H<sub>5</sub>CH<sub>2</sub>NH<sub>2</sub> + CO<sub>2</sub> + CH<sub>3</sub>OH

Heating rate 10 K/min., Sample 100 mg.

Reaction conditions: CeO<sub>2</sub> 0.17 g, C<sub>6</sub>H<sub>5</sub>CH<sub>2</sub>NH<sub>2</sub> : CH<sub>3</sub>OH = 5 mmol : 500 mmol, CO<sub>2</sub> 5 MPa, 423 K, 2 h.

Table S1. Results of the reaction of  $C_6H_5CH_2NH_2 + CO_2 + CH_3OH$  over various catalysts

| Catalyst                                 | Amount of products / mmol |              |                                       |                                  |      |
|------------------------------------------|---------------------------|--------------|---------------------------------------|----------------------------------|------|
|                                          | Methyl<br>benzylcarbamate | Dibenzylurea | <i>N</i> -Benzylidene-<br>benzylamine | <i>N</i> -Methyl-<br>benzylamine | DMC  |
| none                                     | 0.00                      | 0.00         | 0.07                                  | 0.05                             | 0.00 |
| CeO <sub>2</sub>                         | 4.1                       | 0.05         | 0.26                                  | 0.06                             | 0.69 |
| CeO <sub>2</sub> *                       | 2.3                       | 0.53         | 0.21                                  | 0.06                             | 0.17 |
| Cs <sub>2</sub> CO <sub>3</sub>          | 0.00                      | 0.07         | 0.10                                  | 0.03                             | 0.00 |
| Cs <sub>2</sub> CO <sub>3</sub> *        | 0.03                      | 0.01         | 0.01                                  | 0.01                             | 0.00 |
| ZrO <sub>2</sub>                         | 0.09                      | 0.03         | 0.09                                  | 0.09                             | 0.03 |
| ZrO <sub>2</sub> *                       | 0.03                      | 0.06         | 0.13                                  | 0.01                             | 0.00 |
| SnO <sub>2</sub>                         | 0.00                      | 0.00         | 0.09                                  | 0.05                             | 0.00 |
| MgO                                      | 0.00                      | 0.00         | 0.09                                  | 0.04                             | 0.00 |
| SiO <sub>2</sub>                         | 0.00                      | 0.00         | 0.06                                  | 0.07                             | 0.00 |
| $\alpha$ -Al <sub>2</sub> O <sub>3</sub> | 0.00                      | 0.00         | 0.03                                  | 0.05                             | 0.00 |
| $\gamma$ -Al <sub>2</sub> O <sub>3</sub> | 0.00                      | 0.00         | 0.05                                  | 0.04                             | 0.00 |
| HSZ (Si/Al=72)                           | 0.00                      | 0.00         | 0.10                                  | 0.10                             | 0.00 |
| HY4.8 (Si/Al=5.2)                        | 0.00                      | 0.00         | 0.12                                  | 0.04                             | 0.00 |
| TiO <sub>2</sub>                         | 0.00                      | 0.00         | 0.08                                  | 0.04                             | 0.00 |
| CuO                                      | 0.00                      | 0.00         | 0.13                                  | 0.05                             | 0.00 |
| Cu <sub>2</sub> O                        | 0.00                      | 0.00         | 0.12                                  | 0.10                             | 0.00 |
| Y <sub>2</sub> O <sub>3</sub>            | 0.00                      | 0.00         | 0.07                                  | 0.05                             | 0.00 |
| FeO                                      | 0.00                      | 0.00         | 0.05                                  | 0.02                             | 0.00 |
| Fe <sub>2</sub> O <sub>3</sub>           | 0.00                      | 0.00         | 0.05                                  | 0.03                             | 0.00 |
| Fe <sub>3</sub> O <sub>4</sub>           | 0.00                      | 0.00         | 0.07                                  | 0.03                             | 0.00 |
| CoO                                      | 0.00                      | 0.00         | 0.15                                  | 0.10                             | 0.00 |
| Co <sub>3</sub> O <sub>4</sub>           | 0.00                      | 0.00         | 0.07                                  | 0.06                             | 0.00 |
| NiO                                      | 0.00                      | 0.00         | 0.08                                  | 0.05                             | 0.00 |
| Mn <sub>2</sub> O <sub>3</sub>           | 0.00                      | 0.00         | 0.04                                  | 0.04                             | 0.00 |
| WO <sub>3</sub>                          | 0.00                      | 0.00         | 0.07                                  | 0.04                             | 0.00 |
| La <sub>2</sub> O <sub>3</sub>           | 0.00                      | 0.00         | 0.09                                  | 0.07                             | 0.00 |
| Pr <sub>6</sub> O <sub>11</sub>          | 0.00                      | 0.00         | 0.06                                  | 0.08                             | 0.00 |
| Nd <sub>2</sub> O <sub>3</sub>           | 0.00                      | 0.00         | 0.09                                  | 0.05                             | 0.00 |
| Sm <sub>2</sub> O <sub>3</sub>           | 0.00                      | 0.00         | 0.07                                  | 0.03                             | 0.00 |
| Eu <sub>2</sub> O <sub>3</sub>           | 0.00                      | 0.00         | 0.04                                  | 0.11                             | 0.00 |
| Gd <sub>2</sub> O <sub>3</sub>           | 0.00                      | 0.00         | 0.05                                  | 0.02                             | 0.00 |
| Tb <sub>4</sub> O <sub>7</sub>           | 0.00                      | 0.00         | 0.05                                  | 0.02                             | 0.00 |

|                                |      |      |      |      |      |
|--------------------------------|------|------|------|------|------|
| Dy <sub>2</sub> O <sub>3</sub> | 0.00 | 0.00 | 0.06 | 0.05 | 0.00 |
| Ho <sub>2</sub> O <sub>3</sub> | 0.00 | 0.00 | 0.05 | 0.02 | 0.00 |
| Er <sub>2</sub> O <sub>3</sub> | 0.00 | 0.00 | 0.05 | 0.05 | 0.00 |
| Yb <sub>2</sub> O <sub>3</sub> | 0.00 | 0.00 | 0.05 | 0.08 | 0.00 |
| Yb <sub>2</sub> O <sub>5</sub> | 0.00 | 0.00 | 0.05 | 0.03 | 0.00 |

---

Reaction conditions:

Catalyst (Metal = 1 mmol), C<sub>6</sub>H<sub>5</sub>CH<sub>2</sub>NH<sub>2</sub> : CH<sub>3</sub>OH = 5 mmol : 500 mmol, CO<sub>2</sub> 5 MPa, 423 K, 12 h.

\* Catalyst (Metal = 1 mmol), C<sub>6</sub>H<sub>5</sub>CH<sub>2</sub>NH<sub>2</sub> : CH<sub>3</sub>OH = 5 mmol : 200 mmol, CO<sub>2</sub> 5 MPa, 423 K, 12 h.

Table S2. Relative molar sensitivity of all the products toward 1-hexanol

| Reactants or products                                  | Relative molar sensitivity |
|--------------------------------------------------------|----------------------------|
| Benzylamine                                            | 1.32                       |
| Aminomethylcyclohexane                                 | 1.15                       |
| Aniline                                                | 1.05                       |
| Aniline                                                | 0.99 <sup>a)</sup>         |
| Methanol                                               | 0.15                       |
| Ethanol                                                | 0.33                       |
| 1-Propanol                                             | 0.75                       |
| 1-Propanol                                             | 0.49 <sup>a)</sup>         |
| 2-Propanol                                             | 0.42                       |
| Methyl benzylcarbamate                                 | 1.30                       |
| Ethyl benzylcarbamate                                  | 1.28                       |
| <i>n</i> -Propyl benzylcarbamate                       | 1.52                       |
| <i>iso</i> -Propyl benzylcarbamate                     | 1.52 <sup>b)</sup>         |
| Methyl <i>N</i> -(cyclohexylmethyl)carbamate           | 0.83                       |
| Ethyl <i>N</i> -(cyclohexylmethyl)carbamate            | 1.39                       |
| <i>n</i> -Propyl <i>N</i> -(cyclohexylmethyl)carbamate | 1.54                       |
| Methyl methylcarbamate                                 | 0.26 <sup>c)</sup>         |
| Methyl phenylcarbamate                                 | 0.86                       |
| Ethyl phenylcarbamate                                  | 1.37                       |
| <i>n</i> -Propyl phenylcarbamate                       | 0.78                       |
| Dibenzylurea                                           | 0.32                       |
| <i>N</i> -Benzylidenebenzylamine                       | 2.78                       |
| <i>N</i> -Methyl benzylamine                           | 1.59                       |
| <i>N</i> -Ethyl benzylamine                            | 1.56                       |
| <i>N</i> -Propyl benzylamine                           | 2.04                       |
| Dimethyl carbonate                                     | 0.19                       |
| Diethyl carbonate                                      | 0.61                       |
| Dipropyl carbonate                                     | 1.25                       |

a) TC-WAX was used as a capillary column.

b) *n*-Propyl benzylcarbamate was used.

c) Ethyl carbamate was used.
